# Supplementary material for: Modified SiO hierarchical structure materials with improved initial coulombic efficiency for advanced lithium-ion battery anodes
Source: Royal Society of Chemistry journal article supplement (doi:10.1039/c9ra00778d), 2019-01-01
Supplement: c9ra00778d1.pdf [file c9ra00778d1.pdf]

Supporting Information

# Modified SiO Hierarchical Structure Materials with Improved Initial Coulombic Efficiency for Advanced Lithium-ion Battery Anode

*Lizhao Xie, Hui Liu, Shaoxiong Lin, Xulai Yang, Meizhou Qi, Lili Zhu, Yujing Guo,*

*Guilue Guo\**

Hefei Guoxuan High-Tech Power Energy Co., Ltd.

\*Address correspondence to [gguo002@e.ntu.edu.sg](mailto:gguo002@e.ntu.edu.sg)(G. Guo)

## Supporting Figures

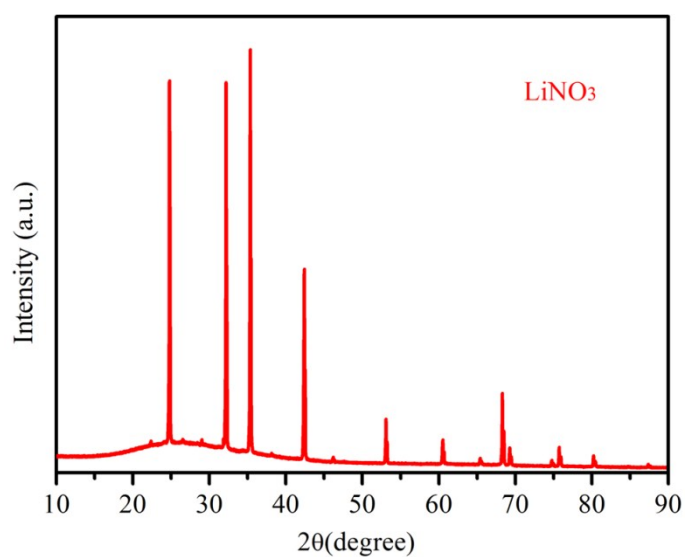

**Figure S1.** The XRD pattern of the solute from the wash supernatant.

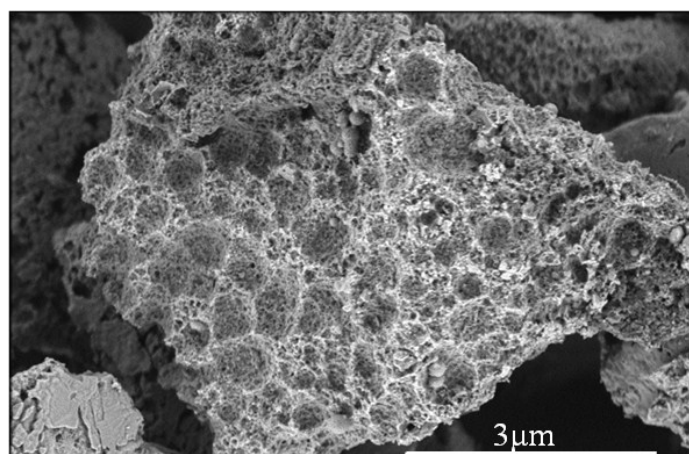

**Figure S2.** The morphology of the  $\text{Si/SiO/Li}_2\text{SiO}_3@\text{C}$  composites after acid treatment.

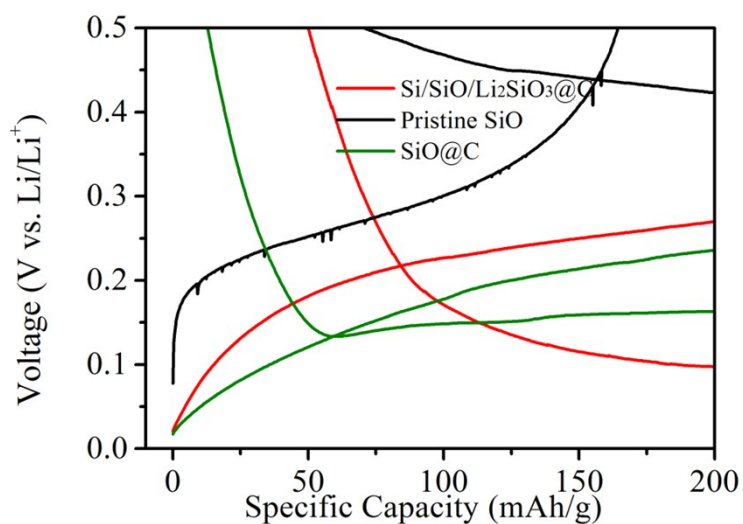

**Figure S3.** Charge and discharge profiles of three samples with an additional current of 50  $\mu\text{A}$ .

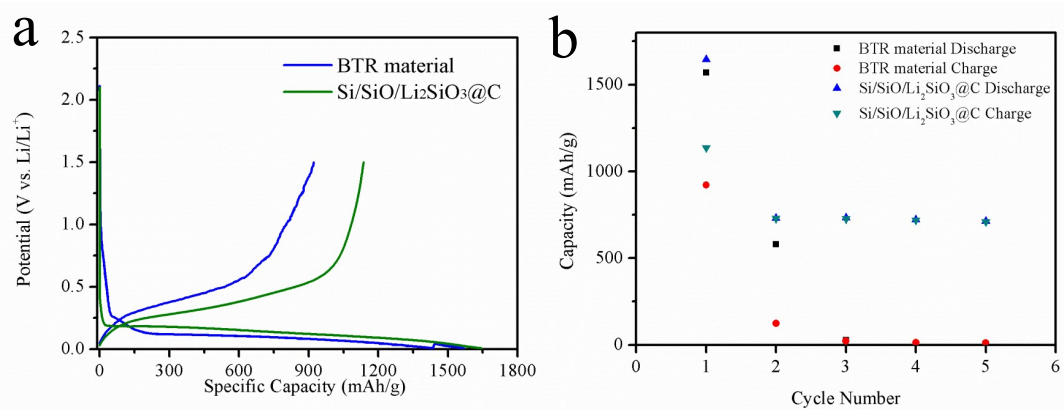

**Figure S4.** (a) The charge/discharge voltage profiles of BTR material and Si/SiO/Li<sub>2</sub>SiO<sub>3</sub>@C composites at the 1<sup>st</sup> cycle, (b) capacities of BTR material and Si/SiO/Li<sub>2</sub>SiO<sub>3</sub>@C in the initial 5 cycles.
